# Supplementary material
Source: ML conference proceedings conference paper supplement (https://proceedings.neurips.cc/paper_files/paper/2016/hash/c2626d850c80ea07e7511bbae4c76f4b-Abstract.html)
Supplement: Supplementary file [file c2626d850c80ea07e7511bbae4c76f4b-Supplemental.zip]

---

# Supplementary Material: Simple and Efficient Weighted Minwise Hashing

---

Anshumali Shrivastava  
 Department of Computer Science  
 Rice University  
 Houston, TX, 77005  
 anshumali@rice.edu

## 1 Proof of Correctness

First note that, every number between  $[0, M]$  is random and equally likely in a random sampling. Therefore, for a given point  $x$ , at the time we stop we sample uniformly from the green region  $x_{green} = \cup_{i=1}^D [M_i, M_i + x_i]$ . Consider the index  $j$  defined as,

$$j = \min\{h(x), h(y)\} \quad (1)$$

For any pair of points  $x$  and  $y$ , consider the following three events: 1)  $h(x) = h(y) = j$ , 2)  $h(x) > h(y) = j$  and 3)  $j = h(x) < h(y)$ . Observe that,

$$h(x) = h(y) = j \text{ if and only if } r_j \in x_{green} \cap y_{green} \quad (2)$$

$$h(x) > h(y) = j \text{ if and only if } r_j \in y_{green} - x_{green} \quad (3)$$

$$h(y) > h(x) = j \text{ if and only if } r_j \in x_{green} - y_{green} \quad (4)$$

Since  $r_j$  is uniformly chosen, we have,

$$\begin{aligned} Pr(h(x) = h(y)) &= \frac{|x_{green} \cap y_{green}|}{|(x_{green} \cap y_{green}) \cup (x_{green} - y_{green}) \cup (y_{green} - x_{green})|} \\ &= \frac{|x_{green} \cap y_{green}|}{|x_{green} \cup y_{green}|} \end{aligned} \quad (5)$$

The proof follows from substituting the values of  $|x_{green} \cap y_{green}|$  and  $|x_{green} \cup y_{green}|$  given by:

$$\begin{aligned} |x_{green} \cap y_{green}| &= |\cup_{i=1}^D [M_i, M_i + x_i] \cap \cup_{i=1}^D [M_i, M_i + y_i]| \\ &= |\cup_{i=1}^D [M_i, M_i + \min\{x_i, y_i\}]| = \sum_{i=1}^D \min\{x_i, y_i\} \end{aligned} \quad (6)$$

$$\begin{aligned} |x_{green} \cup y_{green}| &= |\cup_{i=1}^D [M_i, M_i + x_i] \cup \cup_{i=1}^D [M_i, M_i + y_i]| \\ &= |\cup_{i=1}^D [M_i, M_i + \max\{x_i, y_i\}]| = \sum_{i=1}^D \max\{x_i, y_i\}, \end{aligned} \quad (7)$$

### 1.1 Proof of Theorem 2

Expectation follows immediately from the fact that the number of sampling step taken before the process stops, which is also  $h(x)$  is a geometric random variable with  $p = s_x$ . The collision probability follows from observing that  $Pr(h(x) > k) = (1 - s_x)^k \leq \delta$  which implies  $k \leq \frac{\log \delta}{\log(1-s_x)}$  yielding the required bound.

### 1.2 Proof of Corollary 1

**Proof:** The proof follows from Jensens Inequality,  $\mathbb{E}(\log x) \leq \log \mathbb{E}(x)$  and second order Taylor series approximation of  $\mathbb{E}(\log x) \approx \log \mathbb{E}(x) - \frac{Var(x)}{2 \log \mathbb{E}(x)^2}$
